# Supplementary material
Source: PubMed Central journal article supplement (PMC3869538)
Supplement: Supp_Fig1.pdf [file Supp_Fig1.pdf]

## Supplementary Data

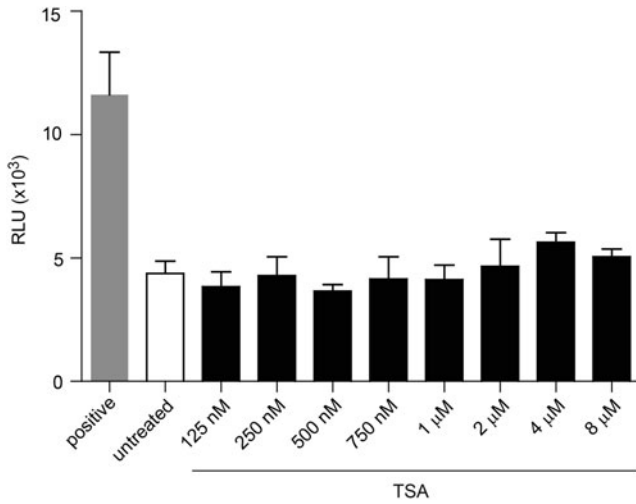

**SUPPLEMENTARY FIG. S1.** Impact of different amounts of TSA on the activation of apoptosis markers caspase-3/7. Myoblasts were untreated or were incubated with the indicated concentrations of TSA for 16 hr. Forty-eight hours after the initiation of the TSA treatments, the caspase-3/7 activities were determined by using a combination of a pro-luminescent caspase-3/7 substrate and a thermostable luciferase. To serve as a positive control for caspase activity, parallel myoblast cultures were exposed for 3 hr to 1  $\mu$ M of the apoptosis-inducing agent staurosporine before initiating the caspase activity assays. The RLU values were normalized in relation to the protein content of the various samples. RLU, relative light units; TSA, trichostatin A.
